# Supplementary material for: Treatment of congenital adrenal hyperplasia in children aged 0–3 years: a retrospective multicenter analysis of salt supplementation, glucocorticoid and mineralocorticoid medication, growth and blood pressure
Source: PubMed Central journal article supplement (PMC9066592; doi:10.1530/eje-21-1085), 2022-03-15
Supplement: supplementary_table_1.pdf [file supplementary_table_1.pdf]

**Supplementary Table 1: Percentage of Blood pressure (BP) >95% percentile (n) at different time points from birth to 3 years of age compared by salt replacement status given in % (n).**

| Age in months |              | total    | NST      | ST       | p-value* |
|---------------|--------------|----------|----------|----------|----------|
| 0             | Systolic RR  | 44% (10) | 40% (2)  | 44% (8)  | 1.00     |
|               | Diastolic RR | 50% (11) | 80% (4)  | 41% (7)  | 0.31     |
| 3             | Systolic RR  | 54% (32) | 57% (8)  | 53% (24) | 1.00     |
|               | Diastolic RR | 60% (35) | 64% (9)  | 59% (26) | 1.00     |
| 6             | Systolic RR  | 52% (34) | 68% (13) | 45% (21) | 0.11     |
|               | Diastolic RR | 73% (47) | 89% (17) | 67% (30) | 0.07     |
| 9             | Systolic RR  | 46% (30) | 59% (10) | 42% (20) | 0.27     |
|               | Diastolic RR | 59% (38) | 76% (13) | 53% (25) | 0.15     |
| 12            | Systolic RR  | 48% (34) | 58% (14) | 43% (20) | 0.22     |
|               | Diastolic RR | 66% (46) | 67% (16) | 65% (30) | 1.00     |
| 18            | Systolic RR  | 57% (38) | 65% (13) | 53% (25) | 0.43     |
|               | Diastolic RR | 75% (50) | 70% (14) | 77% (36) | 0.56     |
| 24            | Systolic RR  | 39% (35) | 46% (13) | 36% (22) | 0.36     |
|               | Diastolic RR | 58% (50) | 54% (15) | 59% (35) | 0.65     |
| 30            | Systolic RR  | 35% (28) | 39% (12) | 35% (16) | 0.63     |
|               | Diastolic RR | 52% (42) | 61% (19) | 45% (23) | 0.18     |
| 36            | Systolic RR  | 19% (22) | 24% (12) | 15% (10) | 0.34     |
|               | Diastolic RR | 33% (37) | 33% (16) | 32% (21) | 1.00     |

\*p-value: group difference tested between children not treated with salt (NST) and children treated with additional salt at least between two visits between birth and 365 days of life (ST), (n).
