# Supplementary material for: Treatment of congenital adrenal hyperplasia in children aged 0–3 years: a retrospective multicenter analysis of salt supplementation, glucocorticoid and mineralocorticoid medication, growth and blood pressure
Source: PubMed Central journal article supplement (PMC9066592; doi:10.1530/eje-21-1085), 2022-03-15
Supplement: supplementary_table_2.pdf [file supplementary_table_2.pdf]

**Supplementary Table 2: Blood pressure (RR) percentiles from birth to 3 years of age compared by salt replacement status (mean  $\pm$  SD (n)).**

| Age in months |              | total             | NST              | ST               | p-value* |
|---------------|--------------|-------------------|------------------|------------------|----------|
| 0             | Systolic RR  | 69 $\pm$ 35 (23)  | 69 $\pm$ 40 (5)  | 69 $\pm$ 35 (18) | 0.97     |
|               | Diastolic RR | 89 $\pm$ 12 (22)  | 93 $\pm$ 10 (5)  | 88 $\pm$ 13 (17) | 0.42     |
| 3             | Systolic RR  | 80 $\pm$ 28 (59)  | 89 $\pm$ 16 (14) | 77 $\pm$ 31 (45) | 0.17     |
|               | Diastolic RR | 91 $\pm$ 12 (58)  | 95 $\pm$ 5 (14)  | 90 $\pm$ 14 (44) | 0.18     |
| 6             | Systolic RR  | 81 $\pm$ 25 (66)  | 87 $\pm$ 22 (19) | 79 $\pm$ 26 (47) | 0.24     |
|               | Diastolic RR | 91 $\pm$ 18 (64)  | 94 $\pm$ 13 (19) | 89 $\pm$ 19 (45) | 0.27     |
| 9             | Systolic RR  | 78 $\pm$ 27 (65)  | 85 $\pm$ 21 (17) | 75 $\pm$ 29 (48) | 0.19     |
|               | Diastolic RR | 92 $\pm$ 13 (64)  | 94 $\pm$ 13 (17) | 91 $\pm$ 12 (47) | 0.42     |
| 12            | Systolic RR  | 80 $\pm$ 28 (71)  | 86 $\pm$ 24 (24) | 76 $\pm$ 29 (47) | 0.15     |
|               | Diastolic RR | 91 $\pm$ 14 (70)  | 89 $\pm$ 16 (24) | 91 $\pm$ 13 (46) | 0.65     |
| 18            | Systolic RR  | 83 $\pm$ 26 (67)  | 83 $\pm$ 30 (20) | 83 $\pm$ 24 (47) | 0.95     |
|               | Diastolic RR | 93 $\pm$ 13 (67)  | 94 $\pm$ 12 (20) | 93 $\pm$ 14 (47) | 0.76     |
| 24            | Systolic RR  | 79 $\pm$ 26 (89)  | 85 $\pm$ 21 (28) | 76 $\pm$ 28 (61) | 0.10     |
|               | Diastolic RR | 89 $\pm$ 16 (87)  | 91 $\pm$ 10 (28) | 88 $\pm$ 18 (59) | 0.45     |
| 30            | Systolic RR  | 80 $\pm$ 22 (82)  | 86 $\pm$ 15 (31) | 76 $\pm$ 25 (51) | 0.05     |
|               | Diastolic RR | 90 $\pm$ 14 (82)  | 91 $\pm$ 14 (31) | 88 $\pm$ 15 (51) | 0.46     |
| 36            | Systolic RR  | 70 $\pm$ 27 (115) | 72 $\pm$ 27 (50) | 69 $\pm$ 28 (65) | 0.54     |
|               | Diastolic RR | 81 $\pm$ 21 (114) | 80 $\pm$ 22 (49) | 82 $\pm$ 20 (65) | 0.63     |

\*p-value: group difference tested between children not treated with salt (NST) and children treated with additional salt at least between two visits between birth and 365 days of life (ST), (n).
